# Supplementary material
Source: PubMed Central journal article supplement (PMC7856342)
Supplement: ofaa640_suppl_supplementary_materials.pdf [file ofaa640_suppl_supplementary_materials.pdf]

## SUPPLEMENTARY DATA

**Table 1: Fatal influenza A and B virus infection**

| Reference             | 1               | 2               | 3               | 4               | 5               | 6               | 7               | 8               | 9               | 10              | 11              | 12              | 13              | 14              | 15               | 16              | 17              | 18              | 19              | 20              | 21              | 22              | 23              | 24              |
|-----------------------|-----------------|-----------------|-----------------|-----------------|-----------------|-----------------|-----------------|-----------------|-----------------|-----------------|-----------------|-----------------|-----------------|-----------------|------------------|-----------------|-----------------|-----------------|-----------------|-----------------|-----------------|-----------------|-----------------|-----------------|
| <b>Cohort details</b> |                 |                 |                 |                 |                 |                 |                 |                 |                 |                 |                 |                 |                 |                 |                  |                 |                 |                 |                 |                 |                 |                 |                 |                 |
| Patients              | 100             | 68              | 45              | 44              | 34              | 21              | 20              | 19              | 15              | 12              | 9               | 9               | 8               | 8               | 7                | 6               | 6               | 5               | 4               | 4               | 4               | 3               | 2               | 2               |
| Virus                 | H1N1            | H1N1            | B               | H1N1            | H1N1            | H1N1            | H1N1            | H1N1            | H1N1            | H1N1            | A               | H1N1            | H1N1            | H1N1            | H1N1             | H1N1            | H1N1            | H1N1            | H1N1            | H1N1            | A               | H7N9            | H1N1            | H5N1            |
| IMV                   | 42              | NA              | NA              | 17              | 12              | 21              | NA              | NA              | 15              | NA              | 4               | NA              | NA              | 8               | 7                | 6               | 5               | 0               | NA              | 4               | 2               | 3               | 2               | 2               |
| Age (years)           | 36 <sup>b</sup> | 27 <sup>a</sup> | 11 <sup>b</sup> | 40 <sup>b</sup> | 42 <sup>b</sup> | 34 <sup>b</sup> | 40 <sup>b</sup> | 57 <sup>b</sup> | 50 <sup>a</sup> | 27 <sup>a</sup> | 53 <sup>b</sup> | 33 <sup>a</sup> | 27 <sup>b</sup> | 40 <sup>a</sup> | 57 <sup>a</sup>  | 30 <sup>a</sup> | 39 <sup>a</sup> | 28 <sup>b</sup> | 28 <sup>a</sup> | 36 <sup>a</sup> | 54 <sup>a</sup> | 73 <sup>a</sup> | 41 <sup>a</sup> | 19 <sup>a</sup> |
| <b>Lung pathology</b> |                 |                 |                 |                 |                 |                 |                 |                 |                 |                 |                 |                 |                 |                 |                  |                 |                 |                 |                 |                 |                 |                 |                 |                 |
| DAD                   | 100             | 42              | 8               | 44              | 25              | 20              | 6               | 9               | 15              | 2               | 7               | 9               | 8               | 8               | 7                | 5               | 5               | 4               | 4               | 4               | 3               | 3               | 2               | 2               |
| Thrombosis            | 17              | 5               | NA              | 0               | 9               | 8               | 4               | NA              | NA              | NA              | 1               | Yes             | 0               | 6               | 7                | NA              | 2               | NA              | 4               | 3               | NA              | NA              | NA              | NA              |
| Vascular inflammation | NA              | NA              | NA              | 0               | NA              | 7 <sup>c</sup>  | NA              | NA              | NA              | NA              | NA              | NA              | NA              | NA              | Yes <sup>d</sup> | NA              | 1 <sup>e</sup>  | NA              | 3 <sup>f</sup>  | 4 <sup>f</sup>  | NA              | NA              | NA              | NA              |
| Bronchopneumonia      | 29              | 68              | 17              | 2               | 19              | NA              | 5               | 1               | 3               | 8               | NA              | Yes             | 1               | 6               | NA               | NA              | 2               | 1               | 3               | NA              | NA              | 0               | 1               | 0               |
| Bronchiolitis         | NA              | 39              | 24              | 19              | 18              | 21              | NA              | 13              | 15              | 10              | 8               | 2               | 8               | NA              | NA               | 2               | Yes             | NA              | 4               | 4               | 2               | NA              | 0               | NA              |
| Alveolar haemorrhage  | 58              | 27              | 30              | NA              | 8               | 5               | 13              | 10              | 15              | 3               | 9               | Yes             | 8               | 3               | NA               | 6               | 1               | 2               | NA              | 3               | 4               | 2               | 1               | NA              |

Table shows numbers unless otherwise stated.

<sup>a</sup>mean; <sup>b</sup>median; <sup>c</sup>perivasculitis involving CD8<sup>+</sup> T-cells; <sup>d</sup>perivasculitis involving CD3<sup>+</sup> T-cells; <sup>e</sup>perivasculitis involving mononuclear cells; <sup>f</sup>inflammatory infiltrate in medium vessel intima and endotheilitis (cell type not stated); <sup>g</sup>perivasculitis (cell type not stated)  
NA: not available; IMV: invasive mechanical ventilation; DAD: diffuse alveolar damage

**Table 2: Fatal SARS and MERS coronavirus infection**

| Reference             | 25              | 26               | 27              | 28               | 29             | 30   |
|-----------------------|-----------------|------------------|-----------------|------------------|----------------|------|
| <b>Cohort details</b> |                 |                  |                 |                  |                |      |
| Patients              | 20              | 8                | 6               | 3                | 1              | 1    |
| Virus                 | SARS            | SARS             | SARS            | SARS             | MERS           | MERS |
| IMV                   | NA              | NA               | 6               | NA               | 1              | 1    |
| Age (years)           | 68 <sup>a</sup> | 42 <sup>a</sup>  | 53 <sup>a</sup> | 48 <sup>a</sup>  | 33             | 45   |
| <b>Lung pathology</b> |                 |                  |                 |                  |                |      |
| DAD                   | 20              | 8                | 6               | 3                | 1              | 1    |
| Thrombosis            | 17              | NA               | 1               | Yes              | NA             | NA   |
| Vascular inflammation | NA              | Yes <sup>c</sup> | NA              | Yes <sup>d</sup> | 1 <sup>e</sup> | NA   |
| Bronchopneumonia      | 10              | 0                | NA              | Yes              | NA             | NA   |
| Bronchiolitis         | NA              | 0                | 1               | NA               | NA             | NA   |
| Alveolar haemorrhage  | 17              | NA               | NA              | NA               | 1              | NA   |

Table shows numbers unless otherwise stated.

<sup>a</sup>mean; <sup>b</sup>median; <sup>c</sup>small vessel, cell type not stated; <sup>d</sup>small veins, involving monocytes, neutrophils and lymphocytes, with fibrinoid necrosis; <sup>e</sup>CD4<sup>+</sup> T-cells  
NA: not available; IMV: invasive mechanical ventilation; DAD: diffuse alveolar damage

**Table 3: Fatal Respiratory Syncytial Virus infection**

| Reference             | 31 | 32             | 33              | 34               | 35              |
|-----------------------|----|----------------|-----------------|------------------|-----------------|
| <b>Cohort details</b> |    |                |                 |                  |                 |
| Patients              | 12 | 8              | 4               | 4                | 2               |
| IMV                   | NA | 0              | NA              | NA               | 0               |
| Age (months)          | NA | 3 <sup>b</sup> | 12 <sup>a</sup> | 13 <sup>b</sup>  | 19 <sup>b</sup> |
| <b>Lung pathology</b> |    |                |                 |                  |                 |
| DAD                   | NA | 0              | 1               | 3                | NA              |
| Oedema                | 12 | 8              | NA              | 3                | NA              |
| Thrombosis            | NA | NA             | NA              | NA               | NA              |
| Vascular inflammation | NA | NA             | NA              | Yes <sup>c</sup> | NA              |
| Bronchopneumonia      | NA | NA             | 2               | NA               | 2               |
| Bronchiolitis         | 7  | 7              | 1               | 4                | 2               |
| Alveolar haemorrhage  | NA | 5              | NA              | 1                | NA              |

Table shows numbers unless otherwise stated.

<sup>a</sup>mean; <sup>b</sup>median; <sup>c</sup>mononuclear cells and infrequent eosinophils

NA: not available; IMV: invasive mechanical ventilation; DAD: diffuse alveolar damage

**Table 4: Fatal Adenovirus infection**

| Reference             | 36               | 37                     | 38               | 39               | 40              | 41             | 42              | 43               | 44             |
|-----------------------|------------------|------------------------|------------------|------------------|-----------------|----------------|-----------------|------------------|----------------|
| <b>Cohort details</b> |                  |                        |                  |                  |                 |                |                 |                  |                |
| Patients              | 18               | 6                      | 3                | 2                | 1               | 1              | 1               | 1                | 1              |
| IMV                   | NA               | NA                     | 2                | 0                | 0               | 1              | 1               | NA               | 1              |
| Age                   | 8 <sup>a,c</sup> | 12.5 <sup>a</sup><br>c | 1 <sup>a,c</sup> | 5 <sup>a,c</sup> | 11 <sup>a</sup> | 2 <sup>b</sup> | 67 <sup>b</sup> | 4.7 <sup>b</sup> | 5 <sup>b</sup> |
| <b>Lung pathology</b> |                  |                        |                  |                  |                 |                |                 |                  |                |
| DAD                   | 18               | 6                      | 3                | NA               | 1               | 1              | 1               | NA               | 1              |
| Oedema                | NA               | NA                     | NA               | 2                | 1               | NA             | NA              | NA               | NA             |
| Thrombosis            | NA               | NA                     | 1                | NA               | NA              | NA             | NA              | NA               | 1              |
| Vascular inflammation | NA               | NA                     | NA               | NA               | NA              | NA             | NA              | 1 <sup>d</sup>   | 1 <sup>e</sup> |
| Bronchopneumonia      | 11               | NA                     | NA               | NA               | NA              | NA             | NA              | NA               | NA             |
| Bronchiolitis         | NA               | 6                      | 3                | NA               | 1               | NA             | 1               | NA               | NA             |
| Alveolar haemorrhage  | NA               | NA                     | 3                | 2                | 1               | 1              | NA              | NA               | NA             |

Table shows numbers unless otherwise stated.

<sup>a</sup>months; <sup>b</sup>years; <sup>c</sup>mean; <sup>d</sup>necrotic vasculitis of pulmonary veins; <sup>e</sup>giant cells

NA: not available; IMV: invasive mechanical ventilation; DAD: diffuse alveolar damage

## References

- Shieh WJ, Blau DM, Denison AM, et al. 2009 pandemic influenza A (H1N1): pathology and pathogenesis of 100 fatal cases in the United States. *Am J Pathol* **2010**; 177: 166-75.
- Sheng ZM, Chertow DS, Ambroggio X, et al. Autopsy series of 68 cases dying before and during the 1918 influenza pandemic peak. *Proc Natl Acad Sci U S A* **2011**; 108: 16416-21.
- Paddock CD, Liu L, Denison AM, et al. Myocardial Injury and Bacterial Pneumonia Contribute to the Pathogenesis of Fatal Influenza B Virus Infection. *The Journal of Infectious Diseases* **2012**; 205: 895-905.
- Shelke VN, Kolhapure RM, Kadam D, et al. Pathologic study of pandemic influenza A (H1N1) 2009 cases from India. *Pathol Int* **2012**; 62: 36-42.
- Gill JR, Sheng ZM, Ely SF, et al. Pulmonary pathologic findings of fatal 2009 pandemic influenza A/H1N1 viral infections. *Arch Pathol Lab Med* **2010**; 134: 235-43.
- Mauad T, Hajjar LA, Callegari GD, et al. Lung pathology in fatal novel human influenza A (H1N1) infection. *Am J Respir Crit Care Med* **2010**; 181: 72-9.
- Nakajima N, Sato Y, Katano H, et al. Histopathological and immunohistochemical findings of 20 autopsy cases with 2009 H1N1 virus infection. *Modern Pathology* **2012**; 25: 1-13.
- Tamme K, Minajeva A, Adamson V, Ristmägi K, Pöder J, Lutsar I. Clinical and pathological findings of fatal 2009-2010 pandemic influenza A (H1N1) infection in Estonia. *Medicina (Kaunas)* **2012**; 48: 48-56.
- Buttignol M, Pires-Neto RC, Rossi e Silva RC, Albino MB, Dolhnikoff M, Mauad T. Airway and parenchyma immune cells in influenza A(H1N1)pdm09 viral and non-viral diffuse alveolar damage. *Respiratory Research* **2017**; 18: 147.
- Brooks EG, Bryce CH, Avery C, Smelser C, Thompson D, Nolte KB. 2009 H1N1 fatalities: the New Mexico experience. *J Forensic Sci* **2012**; 57: 1512-8.
- Feldman PS, Cohan MA, Hierholzer WJ, Jr. Fatal Hong Kong influenza: a clinical, microbiological and pathological analysis of nine cases. *Yale J Biol Med* **1972**; 45: 49-63.
- Bal A, Suri V, Mishra B, et al. Pathology and virology findings in cases of fatal influenza A H1N1 virus infection in 2009-2010. *Histopathology* **2012**; 60: 326-35.
- Rosen DG, Lopez AE, Anzalone ML, et al. Postmortem findings in eight cases of influenza A/H1N1. *Modern Pathology* **2010**; 23: 1449-57.
- Harms PW, Schmidt LA, Smith LB, et al. Autopsy findings in eight patients with fatal H1N1 influenza. *Am J Clin Pathol* **2010**; 134: 27-35.

15. Ackermann M, Verleden SE, Kuehnel M, et al. Pulmonary Vascular Endothelialitis, Thrombosis, and Angiogenesis in Covid-19. *N Engl J Med* **2020**; 383: 120-8.
16. Nin N, Sánchez-Rodríguez C, Ver LS, et al. Lung histopathological findings in fatal pandemic influenza A (H1N1). *Med Intensiva* **2012**; 36: 24-31.
17. Calore EE, Uip DE, Perez NM. Pathology of the swine-origin influenza A (H1N1) flu. *Pathology - Research and Practice* **2011**; 207: 86-90.
18. Carmona F, Carlotti APCP, Ramalho LNZ, Costa RS, Ramalho FS. Evidence of Renal Infection in Fatal Cases of 2009 Pandemic Influenza A (H1N1). *American Journal of Clinical Pathology* **2011**; 136: 416-23.
19. Soto-Abraham MV, Soriano-Rosas J, Díaz-Quiñónez A, et al. Pathological changes associated with the 2009 H1N1 virus. *N Engl J Med* **2009**; 361: 2001-3.
20. Marchiori R, Bredt CSdO, Campos MMFd, Negretti F, Duarte PAD. Pandemic influenza A/H1N1: comparative analysis of microscopic lung histopathological findings. *einstein (São Paulo)* **2012**; 10: 306-11.
21. Fujita J, Ohtsuki Y, Higa H, et al. Clinicopathological findings of four cases of pure influenza virus A pneumonia. *Intern Med* **2014**; 53: 1333-42.
22. Yu L, Wang Z, Chen Y, et al. Clinical, Virological, and Histopathological Manifestations of Fatal Human Infections by Avian Influenza A(H7N9) Virus. *Clinical Infectious Diseases* **2013**; 57: 1449-57.
23. Mukhopadhyay S, Philip AT, Stoppacher R. Pathologic Findings in Novel Influenza A (H1N1) Virus ("Swine Flu") Infection: Contrasting Clinical Manifestations and Lung Pathology in Two Fatal Cases. *American Journal of Clinical Pathology* **2010**; 133: 380-7.
24. To KF, Chan PK, Chan KF, et al. Pathology of fatal human infection associated with avian influenza A H5N1 virus. *J Med Virol* **2001**; 63: 242-6.
25. Hwang DM, Chamberlain DW, Poutanen SM, Low DE, Asa SL, Butany J. Pulmonary pathology of severe acute respiratory syndrome in Toronto. *Mod Pathol* **2005**; 18: 1-10.
26. Gu J, Gong E, Zhang B, et al. Multiple organ infection and the pathogenesis of SARS. *J Exp Med* **2005**; 202: 415-24.
27. Nicholls JM, Poon LL, Lee KC, et al. Lung pathology of fatal severe acute respiratory syndrome. *Lancet* **2003**; 361: 1773-8.
28. Ding Y, Wang H, Shen H, et al. The clinical pathology of severe acute respiratory syndrome (SARS): a report from China. *J Pathol* **2003**; 200: 282-9.
29. Alsaad KO, Hajeer AH, Al Balwi M, et al. Histopathology of Middle East respiratory syndrome coronavirus (MERS-CoV) infection - clinicopathological and ultrastructural study. *Histopathology* **2018**; 72: 516-24.
30. Ng DL, Al Hosani F, Keating MK, et al. Clinicopathologic, Immunohistochemical, and Ultrastructural Findings of a Fatal Case of Middle East Respiratory Syndrome Coronavirus Infection in the United Arab Emirates, April 2014. *Am J Pathol* **2016**; 186: 652-8.
31. Daş T, Sargan A, Yağmur G, et al. Viral Pneumonias in Forensic Autopsies: Evaluation and Classification of Histopathologic Changes With Microbiologic Correlation. *Am J Forensic Med Pathol* **2016**; 37: 255-63.
32. Ikeda T, Tani N, Aoki Y, Shida A, Morioka F, Ishikawa T. Immunohistochemical detection of respiratory syncytial virus at autopsy. *Pediatr Int* **2019**; 61: 781-91.
33. Weber MA, Hartley JC, Ashworth MT, Malone M, Sebire NJ. Virological investigations in sudden unexpected deaths in infancy (SUDI). *Forensic Sci Med Pathol* **2010**; 6: 261-7.
34. Johnson JE, Gonzales RA, Olson SJ, Wright PF, Graham BS. The histopathology of fatal untreated human respiratory syncytial virus infection. *Modern Pathology* **2007**; 20: 108-19.
35. Kakimoto Y, Seto Y, Ochiai E, Satoh F, Osawa M. Cytokine Elevation in Sudden Death With Respiratory Syncytial Virus: A Case Report of 2 Children. *Pediatrics* **2016**: e20161293.
36. Siminovich M, Murtagh P. Acute lower respiratory tract infections by adenovirus in children: histopathologic findings in 18 fatal cases. *Pediatr Dev Pathol* **2011**; 14: 214-7.
37. Garcia AGP, Fonseca MEF, De Bonis M, Ramos HIB, Ferro ZPA, Nascimento JP. Morphological and Virological Studies in Six Autopsies of Children with Adenovirus Pneumonia. *Mem Inst Oswaldo Cruz* **1993**; 88: 141-7.
38. Kim JS, Han HS, Park SH, Chun YK, Lee HJ, Chi JG. Neonatal Adenoviral Pneumonia Report of Three Autopsy Cases. *JKMS* **1997**; 12: 146-50.
39. Quan L, Zhu B, Ishida K, Taniguchi M, Oritani S, Kamikodai Y, Fujita MQ, Maeda H. Sudden infant death attributed to peracute pulmonary infection: two autopsy cases. *Leg Med (Tokyo)* **2000**; 2: 79-83.
40. Henson D, Mufson MA. Myocarditis and pneumonitis with type 21 adenovirus infection. Association with fatal myocarditis and pneumonitis. *Am J Dis Child* **1971**; 121:334-6.
41. Kim KS, Gohd RS. Fatal pneumonia caused by adenovirus type 35. *Am J Dis Child* **1981**; 135: 473-5.
42. Castelli JB, Siciliano RF, Vieira RD, Aiello VD, Strabelli TM. Fatal adenoviral necrotizing bronchiolitis case in a post-cardiac surgery intensive care unit. *Braz J Infect Dis* **2011**;15: 285-7.
43. Hoagland MH, Zinkham WH, Hutchins GM. Generalized venocentric lesions in the virus-associated hemophagocytic syndrome. *Hum Pathol* **1986**; 17: 195-8.
44. Vaideeswar P, Bavdekar SB, Jadhav SM, Balan R, Pandit SP. Necrotizing adenoviral pneumonia: manifestation of nosocomial infection in pediatric intensive care unit. *Indian J Pediatr* **2008**; 75: 1171-4.
